# Supplementary material
Source: PubMed Central journal article supplement (PMC2766540)
Supplement: NIHMS137661-supplement-1.pdf [file NIHMS137661-supplement-1.pdf]

**On-Line Supplemental Table.** Human papillomavirus testing histories of 16 women who were diagnosed with invasive cervical cancer during follow-up while participating in the natural history study of human papillomavirus (HPV) and cervical neoplasia in Guanacaste, Costa Rica (1993-2003). Each test result is separated by “/”. Positive PCR results are denoted by the HPV genotypes detected. HCT = Hybrid Capture Tube Test; hc2 = Hybrid Capture 2

| <b>Patient A</b> |                       |
|------------------|-----------------------|
| <b>Time</b>      | <b>HPV Tests</b>      |
| 0                | 16,58/16/16;hct-;hc2- |
| 806              | 16/16                 |
| 887              |                       |
| 1,034            |                       |
| 1,307            |                       |
| 1,671            |                       |
| 3,407            | 16                    |
| 3,514            |                       |
| <b>Patient B</b> |                       |
| <b>Time</b>      | <b>HPV Tests</b>      |
| 0                | 16/16;hct+            |
| 42               |                       |
| 557              | 16                    |
| 662              |                       |
| 725              |                       |
| <b>Patient C</b> |                       |
| <b>Time</b>      | <b>HPV Tests</b>      |
| 0                | 16/16; hct-           |
| 1,839            | 16,45/16              |
| 1,847            |                       |
| <b>Patient D</b> |                       |
| <b>Time</b>      | <b>HPV Tests</b>      |
| 0                | Neg/Neg; hct-         |
| 2,191            | 18/Unchar/18          |
| 2,554            | Neg                   |
| 2,603            |                       |
| <b>Patient E</b> |                       |
| <b>Time</b>      | <b>HPV Tests</b>      |

|     |                        |
|-----|------------------------|
| 0   | 45,84/45/45,51,58;hct+ |
| 157 | 45,58;hc2+             |
| 594 | 45/45                  |
| 643 |                        |

**Patient F**

| Time  | HPV Tests          |
|-------|--------------------|
| 0     | unchar/16/16; hct+ |
| 88    | 16                 |
| 400   | 16                 |
| 802   | 16/16              |
| 1,043 |                    |

**Patient G**

| Time  | HPV Tests |
|-------|-----------|
| 0     | 18;hct-   |
| 1,829 | 18,58     |
| 1,928 |           |

**Patient H**

| Time  | HPV Tests                          |
|-------|------------------------------------|
| 0     | Neg/Neg/Neg/61/61/61/61/61/51;hct- |
| 399   | Neg/Neg/Neg/Neg/unchar/33          |
| 952   | Neg/Neg/Neg/Neg/Neg/61             |
| 1,344 | Neg/Neg/Neg/Neg/Neg/Neg            |
| 1,721 | Neg/Neg/Neg/Neg/Neg/Neg            |
| 1,833 | Neg/Neg/Neg/Neg/Neg/Neg            |
| 2,556 | Neg/Neg/52/33,35,52,58/52          |
| 2,774 |                                    |

**Patient I**

| Time  | HPV Tests       |
|-------|-----------------|
| 0     | 16/71;hct-;hc2+ |
| 56    | 16              |
| 154   |                 |
| 2,307 |                 |

**Patient J**

| Time | HPV Tests           |
|------|---------------------|
| 0    | Neg/52/52;hct-;hc2- |
| 105  | 52                  |

401  
462  
497  
2,459  
2,502

52/52

**Patient K**

**Time**

**HPV Tests**

0 Neg/Neg/Neg/Neg/Neg  
123 Neg/Neg  
413 Neg/Neg/Neg/Neg/Neg  
476

**Patient L**

**Time**

**HPV Tests**

0 18/Neg/18;hc2+  
115 18,61  
315  
408 18/18,85  
531

**Patient M**

**Time**

**HPV Tests**

0 51/18/18,51;hct+  
57  
420 18/18/Neg  
805 55/55/55/55/Neg/18  
1,169 18/18/Neg/18/Neg/Unchar  
1,534 18/18/18/18/Neg/Neg  
1,841 18/18,56/Neg/18/18/18/18  
2,629 18,73/Neg/18/18,73/Neg/Unchar  
2,928  
2,979  
3,166  
3,215

**Patient N**

**Time**

**HPV Tests**

0 16/16/16;hct+  
54 16

405  
3,221

16/16  
16

**Patient O**

**Time**

0

4,021

**HPV Tests**

Neg;hct-

**Patient P**

**Time**

0

2,198

2,237

**HPV Tests**

Neg; hct-

Neg

---
